# Supplementary material for: Near-infrared light controlled photocatalytic activity of carbon quantum dots for highly selective oxidation reaction
Source: Royal Society of Chemistry journal article supplement (doi:10.1039/c3nr00092c), 2013-01-01
Supplement: c3nr00092c.pdf [file c3nr00092c.pdf]

# Near-Infrared Light Controlled Photocatalytic Activity of Carbon Quantum Dots for Highly Selective Oxidation Reaction

Haitao Li,<sup>a</sup> Ruihua Liu,<sup>a</sup> Suoyuan Lian,<sup>a,b</sup> Yang Liu,<sup>\*a</sup> Hui Huang,<sup>a</sup> Zhenhui Kang<sup>\*a</sup>

## Supporting Information

### 1. Figures

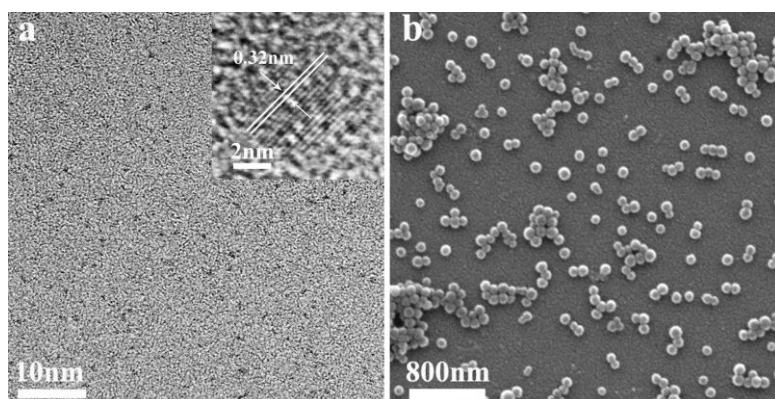

**Figure S1** (a) TEM image of CQDs, inset is the HRTEM image; (b) SEM image of CNPs.

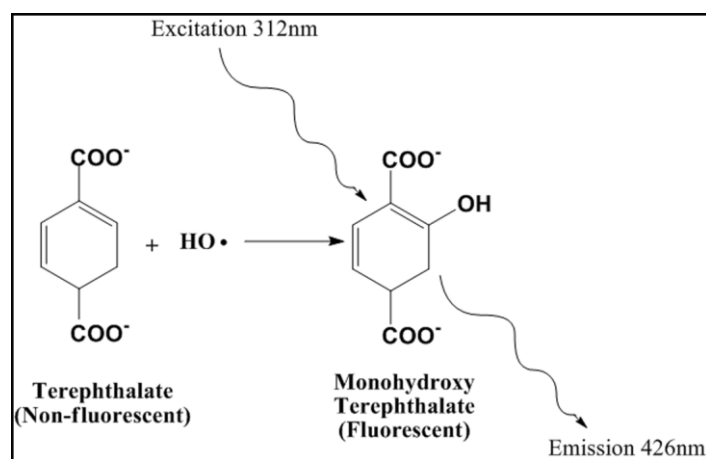

**Figure S2.** Reaction between hydroxyl radicals and terephthalate yielding one intensely fluorescent mono-hydroxylated isomer.

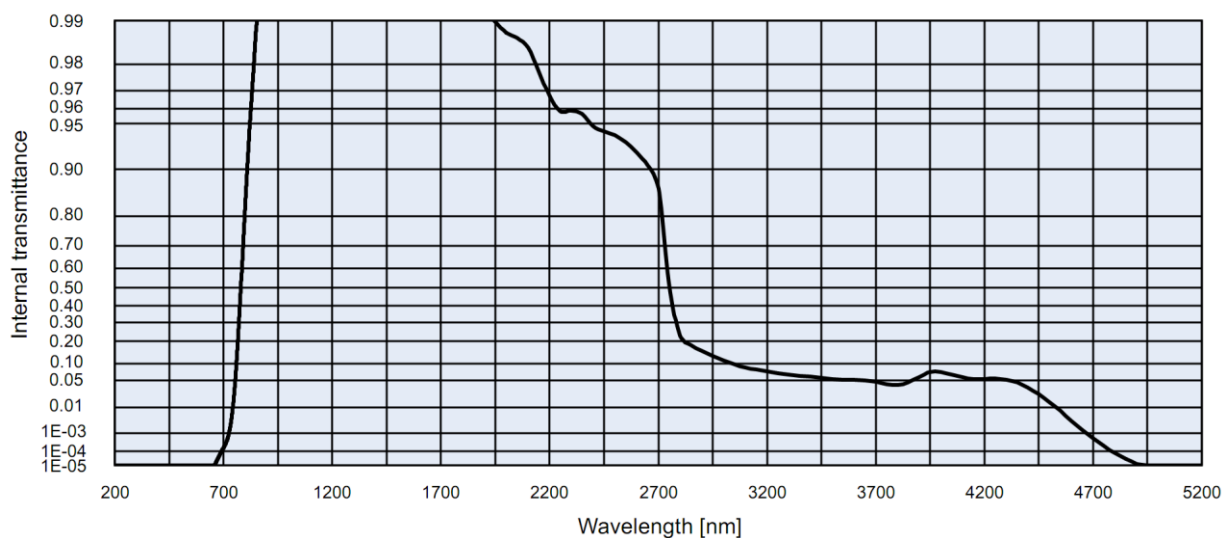

**Figure S3** The wavelength distribution of light after filtered by Schott optical filter RG780.

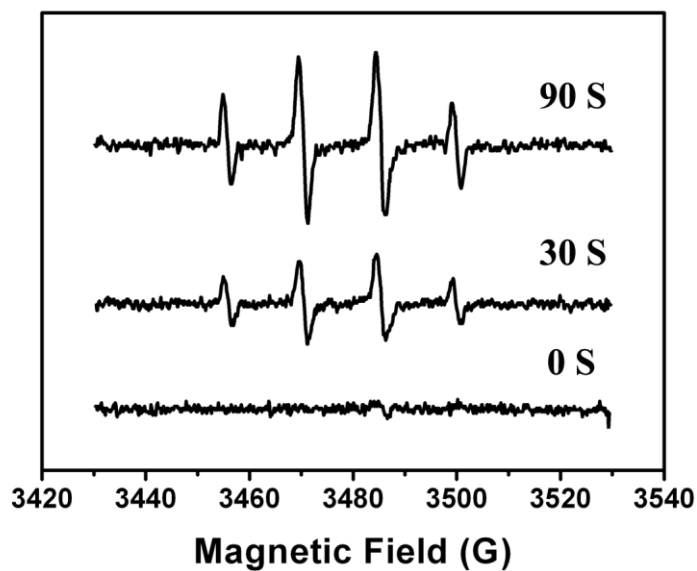

**Figure S4.** The ESR signals of the DMPO-•OH (aqueous solution) adducts for CQDs/H<sub>2</sub>O<sub>2</sub> system under NIR light irradiation. [CQDs]=4 mg/50 mL; [H<sub>2</sub>O<sub>2</sub>]= 10mM; [DMPO]=40mM.

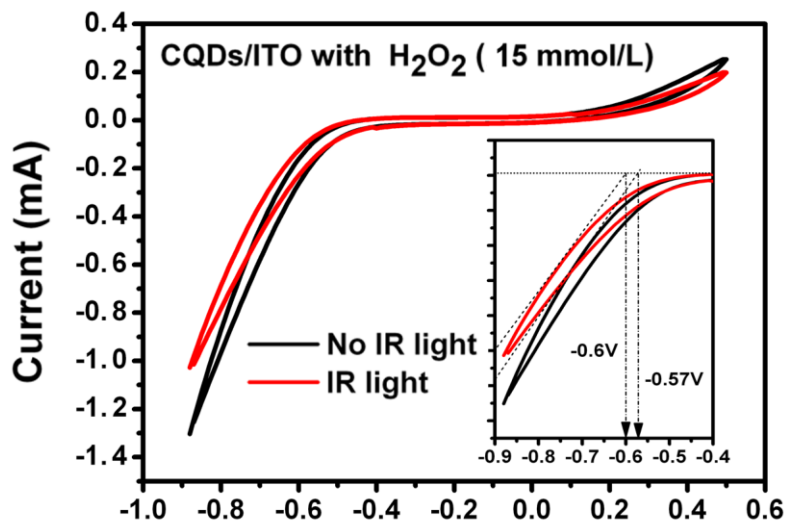

**Figure S5** Cyclic voltammograms of the CQDs/ITO electrode in 0.05 M (pH 7.4) phosphate buffer and in the presence of 15 mM of H<sub>2</sub>O<sub>2</sub> under NIR light irradiation or not.

## 2. Table

**Table S1** Selective oxidation of alcohols to aldehydes and ketones without NIR light irradiation and CQDs catalyst.<sup>[a]</sup>

| Entry | Reactants | Products | Conv. [%] |
|-------|-----------|----------|-----------|
| 1     |           |          | 21        |
| 2     |           |          | 18        |
| 3     |           |          | 22        |
| 4     |           |          | 20        |
| 5     |           |          | 17        |
| 6     |           |          | 25        |
| 7     |           |          | 16        |
| 8     |           |          | 21        |

[a] 10 mmol alcohol, H<sub>2</sub>O<sub>2</sub> (10 mmol, 30 wt% in water), no catalyst, 60°C, 12 h without NIR light irradiation. H<sub>2</sub>O<sub>2</sub> was added continuously over 12 h.

**Table S2.** Selective photocatalytic oxidation of benzyl alcohol and its derivatives into corresponding aldehydes in the presence of CQDs and H<sub>2</sub>O<sub>2</sub> under irradiation with NIR light after three cycles.<sup>[a]</sup>

| Entry | Reactants                                                                         | Products                                                                          | Conv. [%] | Sel. [%] |
|-------|-----------------------------------------------------------------------------------|-----------------------------------------------------------------------------------|-----------|----------|
| 1     | 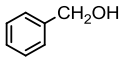 |  | 90        | 100      |
| 2     |  |  | 84        | >99      |
| 3     |  |  | 89        | >98      |
| 4     |  |  | 87        | >98      |
| 5     |  |  | 86        | >99      |
| 6     |  |  | 86        | >99      |
| 7     |  |  | 87        | >96      |
| 8     |  |  | 87        | >99      |

<sup>[a]</sup> 10 mmol alcohol, H<sub>2</sub>O<sub>2</sub> (10 mmol, 30 wt% in water), 8 mg CQDs catalyst, 60°C, followed by NIR irradiation for 12 h. H<sub>2</sub>O<sub>2</sub> was added continuously over 12 h.
